# Supplementary material
Source: PubMed Central journal article supplement (PMC6827562)
Supplement: NIHMS1055892-supplement-Supplemental.pdf [file NIHMS1055892-supplement-Supplemental.pdf]

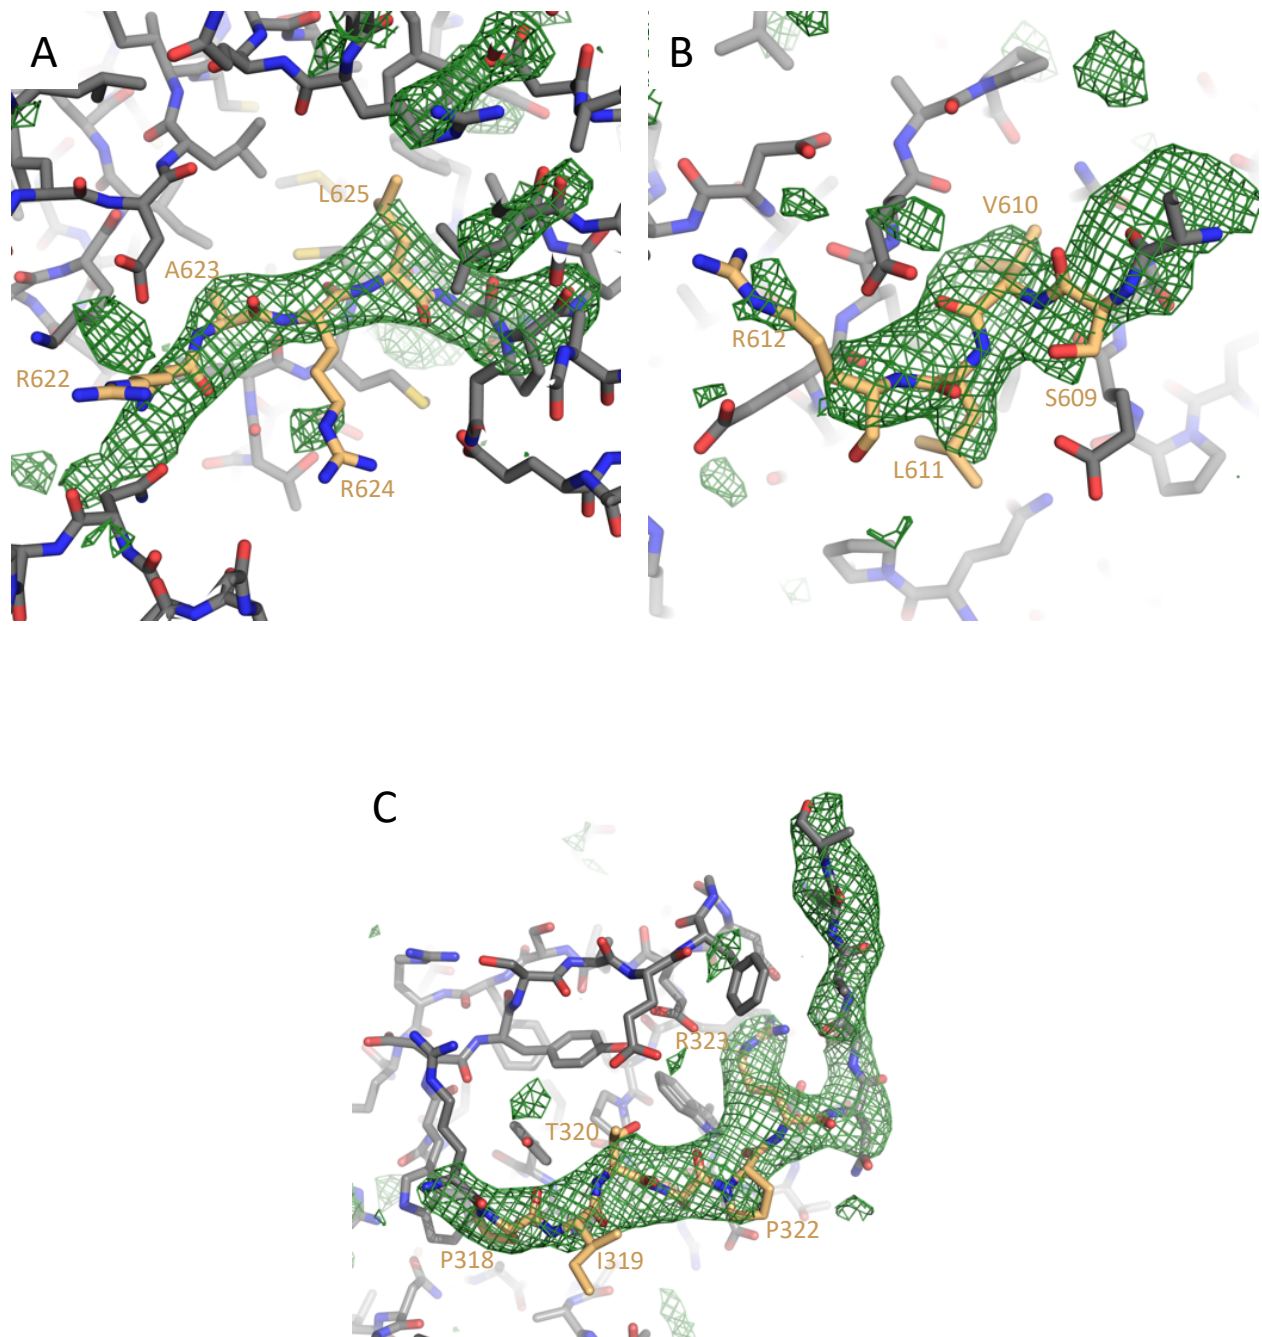

**Figure S1. *iASPP-PP-1 $\alpha$*  representative electron density.**

Related to Figures 1 and 2.

Shown is representative  $F_o - F_c$  difference electron density (green), phased with *iASPP*<sub>627-828</sub> and *PP-1 $\alpha$* <sub>1-300</sub> placed by molecular replacement before refinement, and contoured at  $2.5 \sigma$ . Difference density is shown for the RARL (A), SILK (B) and PxxPxR (C) motifs. In each panel, the omitted motif is shown as beige sticks and residues are labelled.

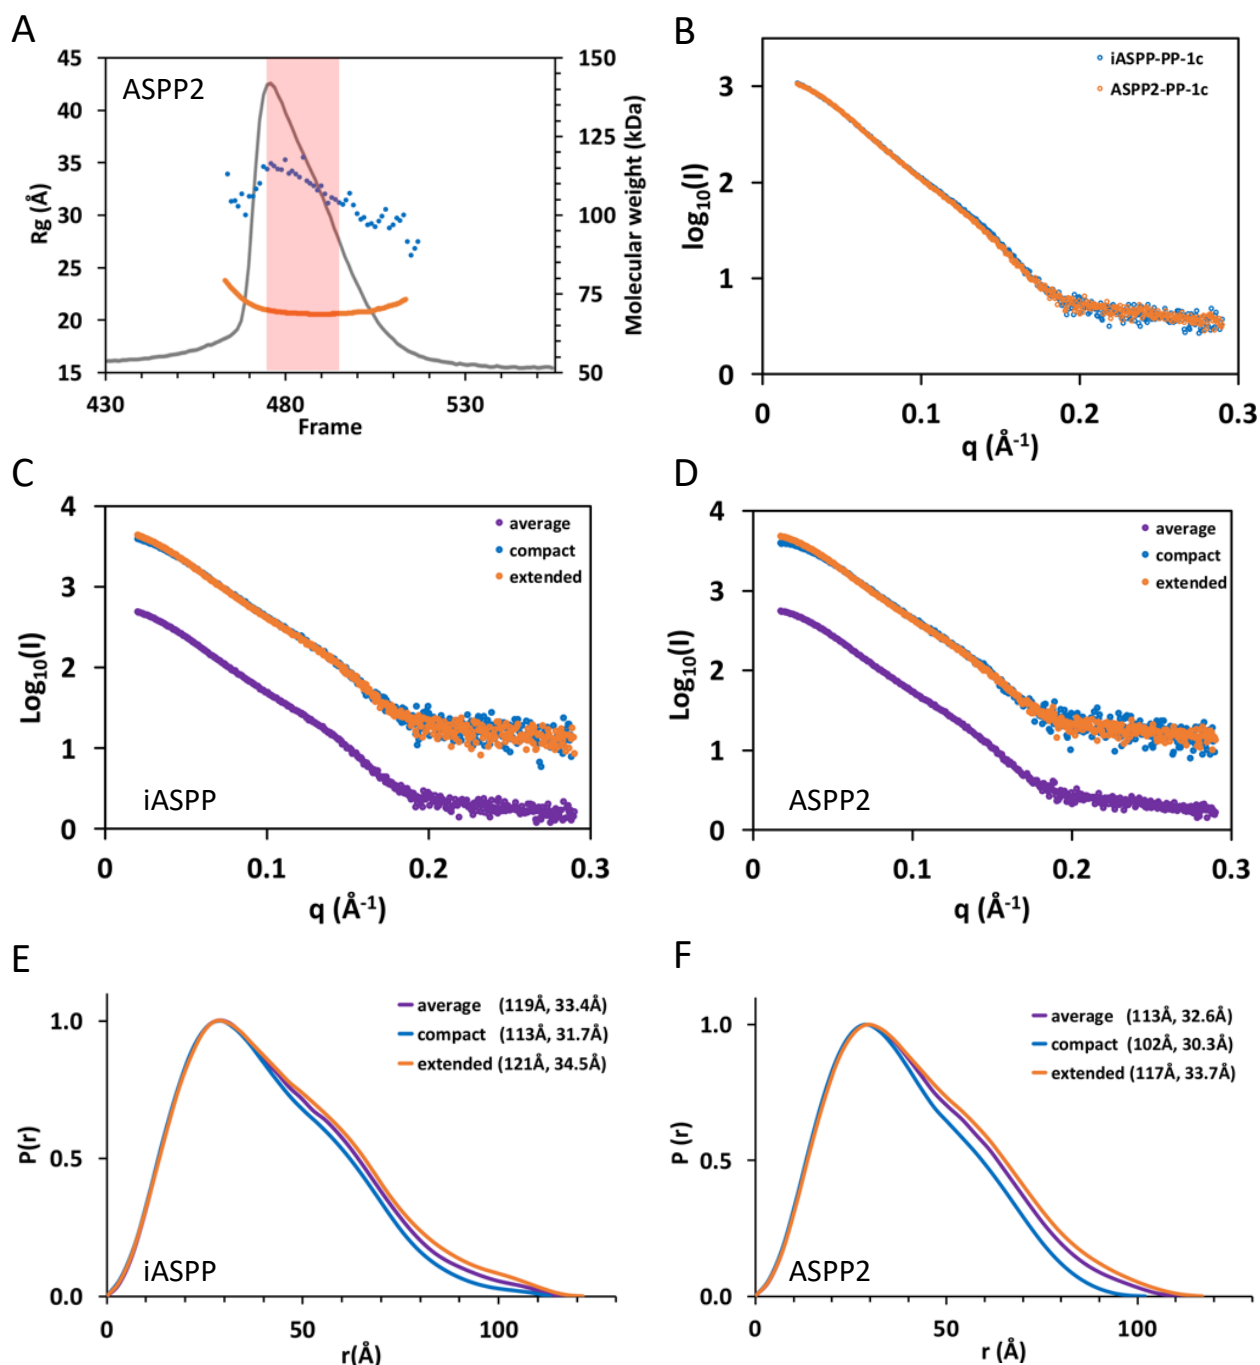

**Figure S2. SEC-SAXS analysis of *iASPP-PP-1c* and *ASPP2-PP-1c*.**

Related to Figure 3.

(A) SEC-SAXS on *ASPP2-PP-1c*. The grey trace corresponds to the size exclusion UV<sub>280</sub> trace, the blue dots give the  $R_g$  values calculated by Guinier approximation for each frame, and the orange trace gives the MW as determined by MALLS.

(B) Comparison of the scattering from *iASPP-PP-1c* with *ASPP2-PP-1c*, integrated from peak maximum to 1/2 maximal peak height (pink region in (A)).

(C) and (D) RAW deconvolution of scattering into compact and extended subsets for *iASPP-PP-1c* (C) and *ASPP2-PP-1c* (D).

(E) and (F)  $P(r)$  plots for RAW deconvoluted scattering for *iASPP-PP-1c* (E) and *ASPP2-PP-1c* (F).

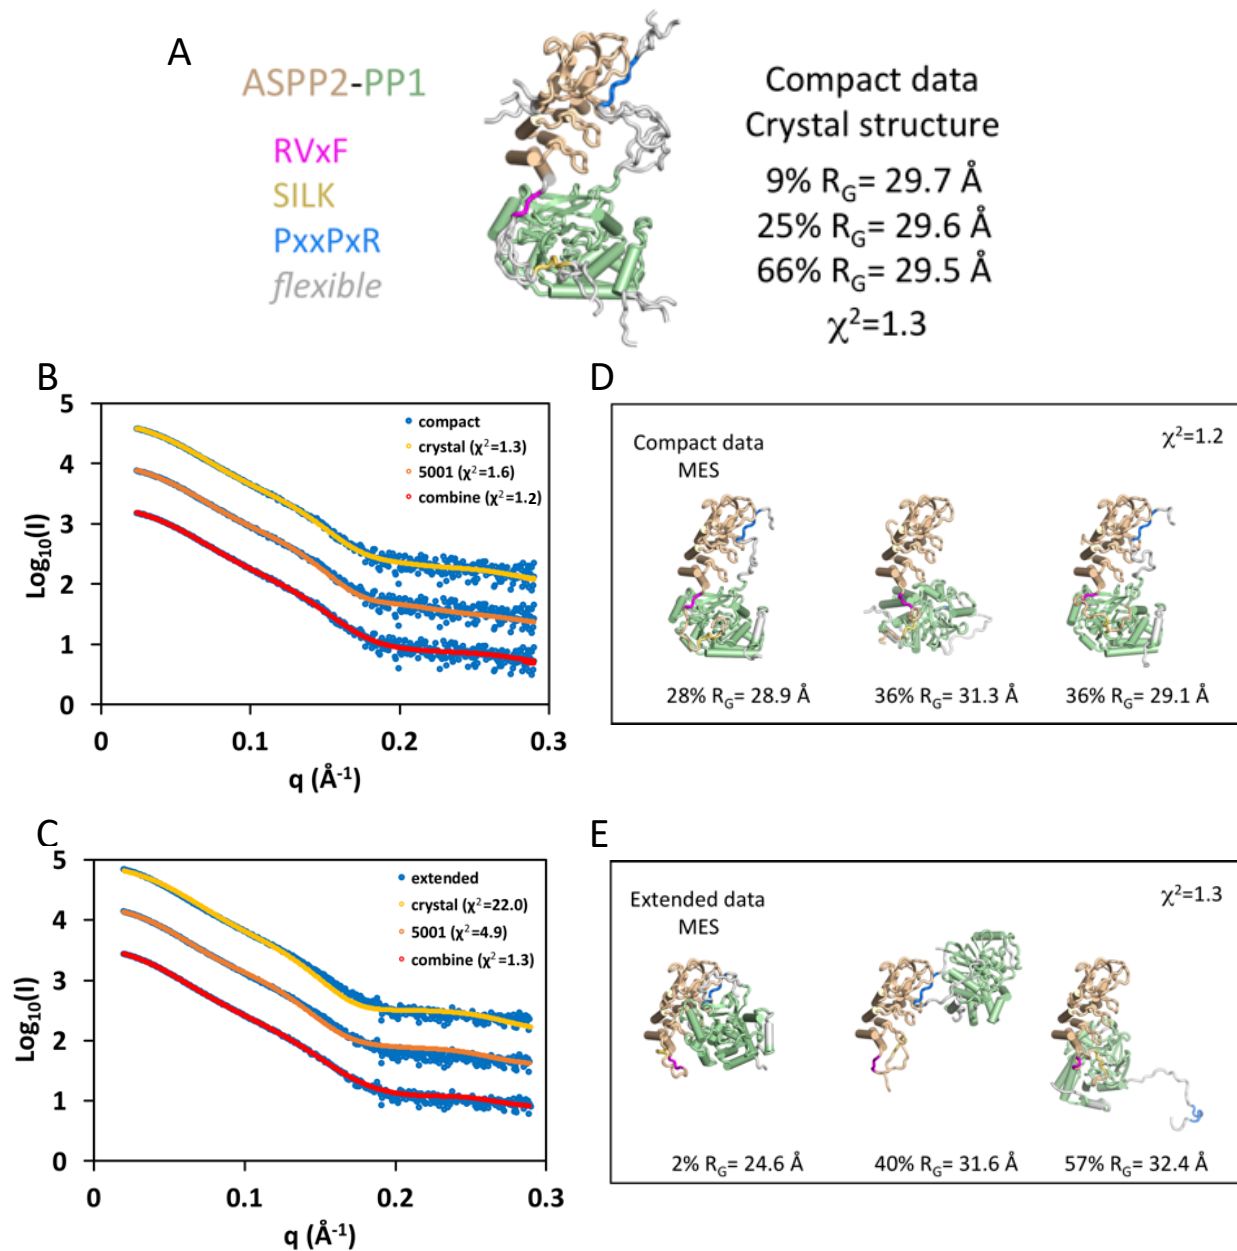

**Figure S3. MES analysis of ASPP2-PP1c.**

Related to Figure 3.

(A) MES modeling using the 5011 library (based on the open form of the iASPP-PP1c crystal structure). The three model ensemble is shown superimposed with color coding as shown on the left. The percent of each model,  $R_G$  and  $\chi^2$  are given.

(B) and (C) Fit of the compact (B) and extended (C) data sets to calculated scattering from the MES models derived from the 5011 library (crystal), the 5001 library, and the combined libraries. (D) and (E) Three model ensembles derived from the combined libraries for the compact data set (D) and the extended data set (E).

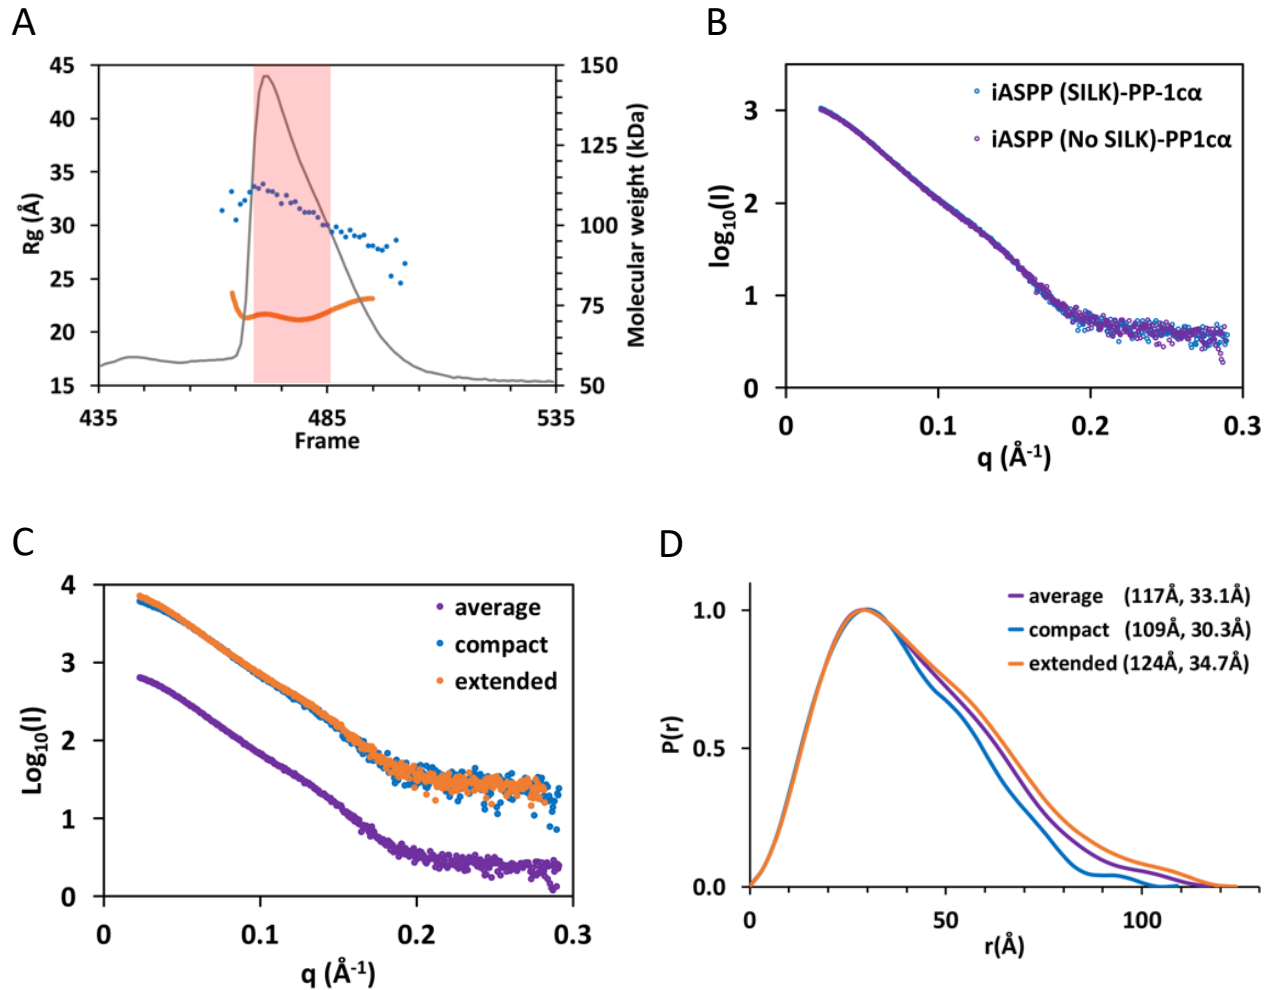

**Figure S4. SEC-SAXS analysis of iASPP(621-828) lacking the SILK motif bound to PP-1c.**

Related to Figure 3.

(A) SEC-SAXS of iASPP(621-828)-PP-1c. The grey trace corresponds to the size exclusion UV<sub>280</sub> trace, the blue dots give the  $R_g$  values calculated by Guinier approximation for each frame, the orange trace gives the MW as determined by MALLS. The data from the region marked in pink was used for subsequent analyses.

(B) Comparison of scattering from the iASPP(608-828)-PP-1c complex (contains the SILK motif) with scattering from iASPP(621-828)-PP-1c (lacking the SILK motif).

(C) RAW deconvolution of iASPP(621-828)-PP-1c scattering into extended and compact subsets.

(D)  $P(r)$  plots for RAW deconvoluted scattering for iASPP(621-828)-PP-1c. For each trace, the  $D_{max}$  (left value) and  $R_g$  (right value) are listed.

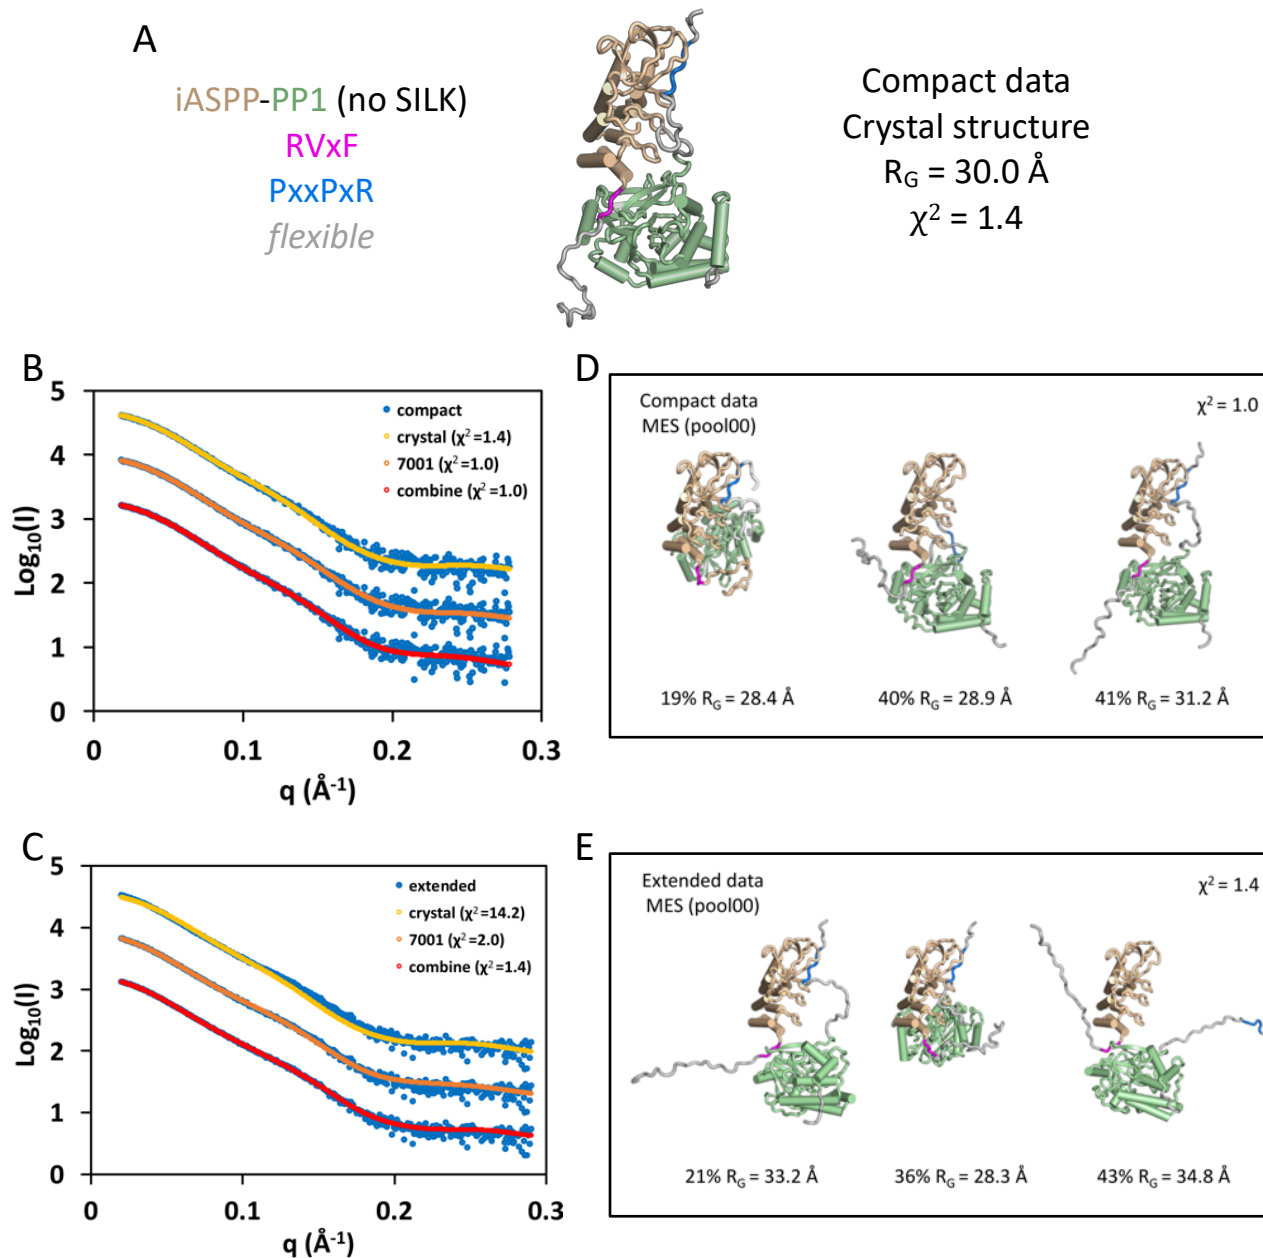

**Figure S5. MES analysis of iASPP(621-828) lacking the SILK motif bound to PP-1c.**

Related to Figure 3.

(A) MES modeling against the compact iASPP(621-828)-PP-1c data set using a library based on the open form of the iASPP-PP-1c crystal structure with the SILK motif deleted. The single best fit model is shown with color coding as shown on the left.

(B) and (C) Fit of the compact (B) and extended (C) data sets to calculated scattering from the MES models derived from the crystal structure library, the 7001 library (in which the ASPP and PP-1c domains are defined as independent rigid bodies), and the combined libraries, in which the RVxF and PxxPxR motifs are allowed to release from their respective binding partners.

(D) and (E) Three model ensembles derived from the combined libraries for the compact data set (D) and the extended data set (E). The percent of each model,  $R_G$  and  $\chi^2$  are given.

**Table S1:** MES analysis of iASPP-PP-1c SAXS data, Related to Figure 3

| Pool (library) <sup>1</sup>                                          | Experimental Data: iASPP-PP-1c                          |             |      |                                 |             |      |                               |              |     |      |      |      |     |
|----------------------------------------------------------------------|---------------------------------------------------------|-------------|------|---------------------------------|-------------|------|-------------------------------|--------------|-----|------|------|------|-----|
|                                                                      | Deconvoluted Small <sup>2</sup>                         |             |      | Deconvoluted Large <sup>2</sup> |             |      | Non-deconvoluted <sup>2</sup> |              |     |      |      |      |     |
| 5011                                                                 | R <sub>G</sub> Range of Pool                            | 28.9 - 29.7 |      |                                 |             |      |                               |              |     |      |      |      |     |
|                                                                      | D <sub>max</sub> Range of Pool                          | 90 - 110    |      |                                 |             |      |                               |              |     |      |      |      |     |
|                                                                      | FOXS Chi <sup>2</sup> Range of Pool <sup>3</sup>        | 3.2 – 10.7  |      |                                 | 17.8 – 41.2 |      |                               | 25.3 – 69.3  |     |      |      |      |     |
|                                                                      | Chi <sup>2</sup> of best model/ensemble                 | 3.2         |      |                                 | 17.8        |      |                               | 25.3         |     |      |      |      |     |
|                                                                      | Pool ID/R <sub>G</sub> /D <sub>max</sub> % <sup>4</sup> | 5011        | 29.7 | 97.2                            | 100         | 5011 | 29.7                          | 97.2         | 100 | 5011 | 29.7 | 97.2 | 100 |
|                                                                      | R <sub>G</sub> Range of Pool                            | 27.4 - 28.3 |      |                                 |             |      |                               |              |     |      |      |      |     |
|                                                                      | D <sub>max</sub> Range of Pool                          | 84 - 100    |      |                                 |             |      |                               |              |     |      |      |      |     |
| 5013                                                                 | FOXS Chi <sup>2</sup> Range of Pool                     | 9.3 – 23.2  |      |                                 | 34.0 – 70.1 |      |                               | 57.9 – 129.3 |     |      |      |      |     |
|                                                                      | Chi <sup>2</sup> of best model/ensemble                 | 9.3         |      |                                 | 34.0        |      |                               | 57.9         |     |      |      |      |     |
|                                                                      | Pool ID/R <sub>G</sub> /D <sub>max</sub> %              | 5013        | 28.3 | 88.5                            | 100         | 5013 | 28.3                          | 88.5         | 100 | 5013 | 28.3 | 88.5 | 100 |
| <b>Combined Pools</b><br>5001, 5002, 5003, 5004, 5005,<br>5006, 5007 | Chi <sup>2</sup> of 3 model ensemble                    | 1.0         |      |                                 | 1.4         |      |                               | 1.4          |     |      |      |      |     |
|                                                                      | Pool ID/R <sub>G</sub> /D <sub>max</sub> %              | 5005        | 31.6 | 120                             | 40          | 5007 | 31.6                          | 105          | 50  | 5007 | 32.1 | 112  | 44  |
|                                                                      |                                                         | 5007        | 32.2 | 113                             | 32          | 5005 | 32.6                          | 125          | 47  | 5006 | 34.7 | 144  | 34  |
|                                                                      |                                                         | 5006        | 28.6 | 89.7                            | 29          | 5007 | 48.9                          | 130          | 3   | 5007 | 27.8 | 95.4 | 22  |

<sup>1</sup> Identifier for the model library (pool) created using BILBO-MD

<sup>2</sup> Experimental SAXS data was deconvoluted using RAW

<sup>3</sup> Chi<sup>2</sup> are calculated for the individual models in the pool

<sup>4</sup> Pool ID: the code representing the BILBO-MD library; R<sub>G</sub>: radius of gyration for the selected model; D<sub>max</sub>: maximum pairwise interatomic distance in the selected model; %: fraction of the ensemble represented by the model

**Table S1:** MES analysis of iASPP-PP-1c SAXS data, Related to Figure 3

| Pool (library) | Experimental Data: iASPP-PP-1c             |                   |                    |                   |                  |     |
|----------------|--------------------------------------------|-------------------|--------------------|-------------------|------------------|-----|
|                | Deconvoluted Small                         |                   | Deconvoluted Large |                   | Non-deconvoluted |     |
| 5001           | R <sub>G</sub> Range of Pool               | 28.1 - 33.6       |                    |                   |                  | 6.7 |
|                | D <sub>max</sub> Range of Pool             | 89 - 126          |                    |                   |                  |     |
|                | FOXS Chi <sup>2</sup> Range of Pool        | 5.6 - 54          |                    |                   |                  |     |
| 5002           | Chi <sup>2</sup> of best model/ensemble    | 1.8 - 16          |                    | 8.0 - 95          |                  |     |
|                | Pool ID/R <sub>G</sub> /D <sub>max</sub> % | 1.7               | 4.8                |                   |                  |     |
|                |                                            | 5001 30.2 98.1 74 | 5001 32.4 115 53   | 5001 30.4 95.0 23 | 5001 32.4 115 15 |     |
| 5003           | R <sub>G</sub> Range of Pool               | 27.9 - 37.3       |                    |                   |                  | 2.9 |
|                | D <sub>max</sub> Range of Pool             | 89 - 185          |                    |                   |                  |     |
|                | FOXS Chi <sup>2</sup> Range of Pool        | 4.4 - 80          |                    |                   |                  |     |
| 5004           | Chi <sup>2</sup> of best model/ensemble    | 2.3 - 31          |                    | 6.0 - 149         |                  |     |
|                | Pool ID/R <sub>G</sub> /D <sub>max</sub> % | 1.1               | 2.7                |                   |                  |     |
|                |                                            | 5002 28.9 94.2 54 | 5002 34.1 144 46   | 5002 31.3 98.9 30 | 5002 34.1 144 41 |     |
| 5003           | R <sub>G</sub> Range of Pool               | 28.1 - 34.7       |                    |                   |                  | 2.4 |
|                | D <sub>max</sub> Range of Pool             | 89 - 152          |                    |                   |                  |     |
|                | FOXS Chi <sup>2</sup> Range of Pool        | 3.6 - 68          |                    |                   |                  |     |
| 5004           | Chi <sup>2</sup> of best model/ensemble    | 1.2 - 33          |                    | 4.4 - 122         |                  |     |
|                | Pool ID/R <sub>G</sub> /D <sub>max</sub> % | 1.1               | 2.3                |                   |                  |     |
|                |                                            | 5003 28.9 91.9 45 | 5003 33.8 138.9 49 | 5003 28.9 96 35   | 5003 31.2 100 21 |     |
| 5004           | R <sub>G</sub> Range of Pool               | 25.8 - 46.4       |                    |                   |                  | 2.3 |
|                | D <sub>max</sub> Range of Pool             | 75 - 139          |                    |                   |                  |     |
|                | FOXS Chi <sup>2</sup> Range of Pool        | 3.3 - 320         |                    |                   |                  |     |
| 5004           | Chi <sup>2</sup> of best model/ensemble    | 2.0 - 187         |                    | 3.9 - 721         |                  |     |
|                |                                            | 1.0               | 2.3                |                   |                  |     |
|                |                                            |                   |                    |                   |                  |     |

**Table S1:** MES analysis of iASPP-PP-1c SAXS data, Related to Figure 3

| Pool (library) | Experimental Data: iASPP-PP-1c             |             |      |      |    |      |      |      |    |      |      |      |    |
|----------------|--------------------------------------------|-------------|------|------|----|------|------|------|----|------|------|------|----|
|                | Pool ID/R <sub>G</sub> /D <sub>max</sub> % | 5004        | 31.7 | 111  | 65 | 5004 | 31.8 | 108  | 46 | 5004 | 31.0 | 91.5 | 66 |
| 5005           | Pool ID/R <sub>G</sub> /D <sub>max</sub> % | 5004        | 27.6 | 81.9 | 32 | 5004 | 31.0 | 91.5 | 45 | 5004 | 40.6 | 128  | 17 |
|                |                                            | 5004        | 43.5 | 126  | 3  | 5004 | 43.4 | 124  | 9  | 5004 | 27.4 | 91.4 | 17 |
|                | R <sub>G</sub> Range of Pool               | 26.1 - 54.3 |      |      |    |      |      |      |    |      |      |      |    |
| 5006           | D <sub>max</sub> Range of Pool             | 73 - 225    |      |      |    |      |      |      |    |      |      |      |    |
|                | FOXS Chi <sup>2</sup> Range of Pool        | 1.3 - 306   |      |      |    |      |      |      |    |      |      |      |    |
|                | Chi <sup>2</sup> of best model/ensemble    | 1.0         |      |      |    |      |      |      |    |      |      |      |    |
| 5007           | Pool ID/R <sub>G</sub> /D <sub>max</sub> % | 5005        | 32.3 | 117  | 35 | 5005 | 32.3 | 117  | 37 | 5005 | 32.3 | 117  | 59 |
|                |                                            | 5005        | 31.3 | 120  | 35 | 5005 | 32.6 | 129  | 36 | 5005 | 32.7 | 128  | 29 |
|                |                                            | 5005        | 28.9 | 94.2 | 29 | 5005 | 32.0 | 125  | 27 | 5005 | 26.7 | 89   | 12 |
|                | R <sub>G</sub> Range of Pool               | 27.7 - 38.0 |      |      |    |      |      |      |    |      |      |      |    |
|                | D <sub>max</sub> Range of Pool             | 89.1 - 208  |      |      |    |      |      |      |    |      |      |      |    |
|                | FOXS Chi <sup>2</sup> Range of Pool        | 1.9 - 57    |      |      |    |      |      |      |    |      |      |      |    |
|                | Chi <sup>2</sup> of best model/ensemble    | 1.1         |      |      |    |      |      |      |    |      |      |      |    |
| 5007           | Pool ID/R <sub>G</sub> /D <sub>max</sub> % | 5006        | 28.6 | 90.2 | 44 | 5006 | 34.6 | 134  | 53 | 5006 | 34.6 | 134  | 45 |
|                |                                            | 5006        | 31.5 | 98.3 | 34 | 5006 | 28.8 | 91.9 | 24 | 5006 | 28.8 | 91.9 | 34 |
|                |                                            | 5006        | 34.3 | 132  | 22 | 5006 | 31.8 | 98.3 | 23 | 5006 | 31.8 | 98.3 | 21 |
|                | R <sub>G</sub> Range of Pool               | 24.3 - 56.1 |      |      |    |      |      |      |    |      |      |      |    |
|                | D <sub>max</sub> Range of Pool             | 71 - 202    |      |      |    |      |      |      |    |      |      |      |    |
|                | FOXS Chi <sup>2</sup> Range of Pool        | 1.4 - 378   |      |      |    |      |      |      |    |      |      |      |    |
|                | Chi <sup>2</sup> of best model/ensemble    | 1.0         |      |      |    |      |      |      |    |      |      |      |    |
| 5007           | Pool ID/R <sub>G</sub> /D <sub>max</sub> % | 5007        | 31.6 | 106  | 50 | 5007 | 31.6 | 105  | 62 | 5007 | 31.6 | 105  | 44 |
|                |                                            | 5007        | 28.6 | 91   | 41 | 5007 | 38.1 | 121  | 22 | 5007 | 28.1 | 90.3 | 29 |
|                |                                            | 5007        | 37.8 | 118  | 9  | 5007 | 28.0 | 92.9 | 16 | 5007 | 36.9 | 135  | 27 |



**Table S2:** MES analysis of ASPP2-PP-1c SAXS data, Related to Figure 3

| Pool (library) <sup>1</sup>                                          | Experimental Data: ASPP2-PP-1c                          |  |                                 |      |                               |     |      |      |      |     |      |      |      |     |
|----------------------------------------------------------------------|---------------------------------------------------------|--|---------------------------------|------|-------------------------------|-----|------|------|------|-----|------|------|------|-----|
|                                                                      | Deconvoluted Small <sup>2</sup>                         |  | Deconvoluted Large <sup>2</sup> |      | Non-deconvoluted <sup>2</sup> |     |      |      |      |     |      |      |      |     |
|                                                                      | 28.9 - 29.7                                             |  |                                 |      |                               |     |      |      |      |     |      |      |      |     |
|                                                                      | 90 - 110                                                |  |                                 |      |                               |     |      |      |      |     |      |      |      |     |
|                                                                      | 1.3 – 4.8                                               |  | 22 – 56                         |      | 21 – 72                       |     |      |      |      |     |      |      |      |     |
|                                                                      | 1.3                                                     |  | 22                              |      | 21                            |     |      |      |      |     |      |      |      |     |
| 5011                                                                 | Pool ID/R <sub>G</sub> /D <sub>max</sub> % <sup>4</sup> |  | 5011                            | 29.5 | 94.2                          | 66  | 5011 | 29.7 | 97.2 | 100 | 5011 | 29.7 | 97.2 | 100 |
|                                                                      |                                                         |  | 5011                            | 29.6 | 105                           | 25  |      |      |      |     |      |      |      |     |
|                                                                      |                                                         |  | 5011                            | 29.7 | 98.0                          | 9   |      |      |      |     |      |      |      |     |
|                                                                      | 27.4 - 28.3                                             |  |                                 |      |                               |     |      |      |      |     |      |      |      |     |
|                                                                      | 84 - 100                                                |  |                                 |      |                               |     |      |      |      |     |      |      |      |     |
| 5013                                                                 | 3.9 – 12                                                |  | 45 – 99                         |      | 57 - 143                      |     |      |      |      |     |      |      |      |     |
|                                                                      | 3.9                                                     |  | 45                              |      | 57                            |     |      |      |      |     |      |      |      |     |
|                                                                      | Pool ID/R <sub>G</sub> /D <sub>max</sub> %              |  | 5013                            | 28.3 | 88.5                          | 100 | 5013 | 28.3 | 88.5 | 100 |      |      |      |     |
|                                                                      | 1.2                                                     |  | 1.3                             |      | 1.3                           |     |      |      |      |     |      |      |      |     |
| <b>Combined Pools</b><br>5001, 5002, 5003, 5004, 5005,<br>5006, 5007 | Pool ID/R <sub>G</sub> /D <sub>max</sub> %              |  | 5007                            | 29.1 | 89.7                          | 36  | 5005 | 32.4 | 120  | 57  | 5007 | 32.1 | 115  | 53  |
|                                                                      |                                                         |  | 5005                            | 31.3 | 109                           | 36  | 5007 | 31.6 | 105  | 40  | 5005 | 32.2 | 122  | 25  |
|                                                                      |                                                         |  | 5001                            | 28.9 | 90.0                          | 28  | 5007 | 24.6 | 71.8 | 2   | 5003 | 28.6 | 94.9 | 22  |

<sup>1</sup> Identifier for the model library (pool) created using BILBO-MD

<sup>2</sup> Experimental SAXS data was deconvoluted using RAW

<sup>3</sup> Chi2 are calculated for the individual models in the pool

<sup>4</sup> Pool ID: the code representing the BILBO-MD library; R<sub>G</sub>: radius of gyration for the selected model; D<sub>max</sub>: maximum pairwise interatomic distance in the selected model; %: fraction of the ensemble represented by the model

**Table S2:** MES analysis of ASPP2-PP-1c SAXS data, Related to Figure 3

| Pool (library) | Experimental Data: ASPP2-PP-1c             |             |      |                    |           |      |                  |            |      |      |      |      |    |
|----------------|--------------------------------------------|-------------|------|--------------------|-----------|------|------------------|------------|------|------|------|------|----|
|                | Deconvoluted Small                         |             |      | Deconvoluted Large |           |      | Non-deconvoluted |            |      |      |      |      |    |
| 5001           | R <sub>G</sub> Range of Pool               | 28.3 - 33.6 |      |                    |           |      |                  |            |      |      |      |      |    |
|                | D <sub>max</sub> Range of Pool             | 89.2 - 126  |      |                    |           |      |                  |            |      |      |      |      |    |
|                | FOXS Chi <sup>2</sup> Range of Pool        | 2.3 - 22    |      |                    |           |      |                  | 5.8 - 76   |      |      |      |      |    |
|                | Chi <sup>2</sup> of best model/ensemble    | 1.6         |      |                    | 4.9       |      |                  | 5.7        |      |      |      |      |    |
| 5002           | Pool ID/R <sub>G</sub> /D <sub>max</sub> % | 5001        | 30.2 | 98.1               | 58        | 5001 | 32.4             | 115        | 46   | 5001 | 32.2 | 120  | 44 |
|                |                                            | 5001        | 29.0 | 91.6               | 38        | 5001 | 30.4             | 95.0       | 29   | 5001 | 30.4 | 95.0 | 40 |
|                |                                            | 5001        | 28.4 | 91.7               | 4         | 5001 | 32.2             | 120        | 25   | 5001 | 30.2 | 98.1 | 16 |
|                | R <sub>G</sub> Range of Pool               | 27.9 - 37.3 |      |                    |           |      |                  |            |      |      |      |      |    |
| 5003           | D <sub>max</sub> Range of Pool             | 89 - 185    |      |                    |           |      |                  |            |      |      |      |      |    |
|                | FOXS Chi <sup>2</sup> Range of Pool        | 1.7 - 38    |      |                    | 4.4 - 114 |      |                  | 6.9 - 169  |      |      |      |      |    |
|                | Chi <sup>2</sup> of best model/ensemble    | 1.2         |      |                    | 2.8       |      |                  | 2.8        |      |      |      |      |    |
|                | Pool ID/R <sub>G</sub> /D <sub>max</sub> % | 5002        | 28.7 | 91.3               | 42        | 5002 | 31.8             | 105        | 46   | 5002 | 28.9 | 94.2 | 44 |
|                | 5002                                       | 31.3        | 98.4 | 37                 | 5002      | 34.3 | 144              | 29         | 5002 | 32.0 | 103  | 38   |    |
|                | 5002                                       | 28.6        | 91.5 | 21                 | 5002      | 28.8 | 92.1             | 25         | 5002 | 34.1 | 144  | 18   |    |
| 5004           | R <sub>G</sub> Range of Pool               | 28.1 - 34.7 |      |                    |           |      |                  |            |      |      |      |      |    |
|                | D <sub>max</sub> Range of Pool             | 89.1 - 152  |      |                    |           |      |                  |            |      |      |      |      |    |
|                | FOXS Chi <sup>2</sup> Range of Pool        | 1.4 - 43    |      |                    | 3.4 - 97  |      |                  | 3.2 - 138  |      |      |      |      |    |
|                | Chi <sup>2</sup> of best model/ensemble    | 1.2         |      |                    | 1.9       |      |                  | 1.7        |      |      |      |      |    |
| 5003           | Pool ID/R <sub>G</sub> /D <sub>max</sub> % | 5003        | 30.8 | 116.3              | 44        | 5003 | 33.8             | 119        | 42   | 5003 | 28.9 | 93.4 | 41 |
|                |                                            | 5003        | 28.9 | 90.5               | 33        | 5003 | 31.2             | 100        | 40   | 5003 | 33.8 | 119  | 37 |
|                |                                            | 5003        | 28.9 | 94.0               | 24        | 5003 | 28.9             | 95.7       | 18   | 5003 | 31.2 | 100  | 22 |
|                | R <sub>G</sub> Range of Pool               | 25.8 - 46.4 |      |                    |           |      |                  |            |      |      |      |      |    |
| 5004           | D <sub>max</sub> Range of Pool             | 75.4 - 139  |      |                    |           |      |                  |            |      |      |      |      |    |
|                | FOXS Chi <sup>2</sup> Range of Pool        | 1.8 - 183   |      |                    | 2.7 - 511 |      |                  | 3.2 - 1029 |      |      |      |      |    |
|                | Chi <sup>2</sup> of best model/ensemble    | 1.2         |      |                    | 2.2       |      |                  | 1.9        |      |      |      |      |    |

**Table S2:** MES analysis of ASPP2-PP-1c SAXS data, Related to Figure 3

| Pool (library) | Experimental Data: ASPP2-PP-1c             |             |      |      |    |      |      |      |    |      |      |      |    |
|----------------|--------------------------------------------|-------------|------|------|----|------|------|------|----|------|------|------|----|
|                | Pool ID/R <sub>G</sub> /D <sub>max</sub> % | 5004        | 31.7 | 105  | 41 | 5004 | 31.5 | 105  | 68 | 5004 | 31.5 | 106  | 58 |
| 5005           | Pool ID/R <sub>G</sub> /D <sub>max</sub> % | 5004        | 27.2 | 83.4 | 31 | 5004 | 30.9 | 88.5 | 24 | 5004 | 34.5 | 112  | 22 |
|                |                                            | 5004        | 28.9 | 92.0 | 28 | 5004 | 41.9 | 120  | 7  | 5004 | 27.0 | 77.0 | 21 |
|                | R <sub>G</sub> Range of Pool               | 26.1 - 54.3 |      |      |    |      |      |      |    |      |      |      |    |
| 5006           | D <sub>max</sub> Range of Pool             | 73.1 - 225  |      |      |    |      |      |      |    |      |      |      |    |
|                | FOXS Chi <sup>2</sup> Range of Pool        | 2.4 - 300   |      |      |    |      |      |      |    |      |      |      |    |
|                | Chi <sup>2</sup> of best model/ensemble    | 1.2         |      |      |    |      |      |      |    |      |      |      |    |
| 5007           | Pool ID/R <sub>G</sub> /D <sub>max</sub> % | 5005        | 29.5 | 95.3 | 40 | 5005 | 32.3 | 119  | 47 | 5005 | 32.3 | 117  | 52 |
|                |                                            | 5005        | 28.4 | 87.7 | 31 | 5005 | 32.3 | 117  | 42 | 5005 | 31.8 | 110  | 28 |
|                |                                            | 5005        | 31.6 | 103  | 28 | 5005 | 26.9 | 90.4 | 10 | 5005 | 26.8 | 89.1 | 20 |
|                | R <sub>G</sub> Range of Pool               | 27.7 - 38.0 |      |      |    |      |      |      |    |      |      |      |    |
|                | D <sub>max</sub> Range of Pool             | 89.1 - 208  |      |      |    |      |      |      |    |      |      |      |    |
|                | FOXS Chi <sup>2</sup> Range of Pool        | 1.4 - 65    |      |      |    |      |      |      |    |      |      |      |    |
|                | Chi <sup>2</sup> of best model/ensemble    | 1.2         |      |      |    |      |      |      |    |      |      |      |    |
| 5007           | Pool ID/R <sub>G</sub> /D <sub>max</sub> % | 5006        | 31.6 | 114  | 41 | 5006 | 34.5 | 132  | 41 | 5006 | 31.6 | 98.4 | 41 |
|                |                                            | 5006        | 28.7 | 91.5 | 34 | 5006 | 31.8 | 102  | 36 | 5006 | 28.7 | 94.7 | 31 |
|                |                                            | 5006        | 28.6 | 89.7 | 26 | 5006 | 28.7 | 94.7 | 23 | 5006 | 34.3 | 132  | 28 |
|                | R <sub>G</sub> Range of Pool               | 24.3 - 56.1 |      |      |    |      |      |      |    |      |      |      |    |
|                | D <sub>max</sub> Range of Pool             | 71 - 202    |      |      |    |      |      |      |    |      |      |      |    |
|                | FOXS Chi <sup>2</sup> Range of Pool        | 1.5 - 373   |      |      |    |      |      |      |    |      |      |      |    |
|                | Chi <sup>2</sup> of best model/ensemble    | 1.2         |      |      |    |      |      |      |    |      |      |      |    |
| 5007           | Pool ID/R <sub>G</sub> /D <sub>max</sub> % | 5007        | 30.3 | 95.7 | 43 | 5007 | 31.4 | 101  | 72 | 5007 | 32.1 | 114  | 75 |
|                |                                            | 5007        | 28.0 | 85.9 | 34 | 5007 | 37.8 | 118  | 18 | 5007 | 27.7 | 95.3 | 21 |
|                |                                            | 5007        | 31.6 | 103  | 23 | 5007 | 27.8 | 89.1 | 9  | 5007 | 37.8 | 123  | 5  |
